# Supplementary material
Source: Springer Nature journal article supplement (https://www.springermedizin.de/resource/supplementary/13058_2009_2443_MOESM7_ESM.pdf/9701424)

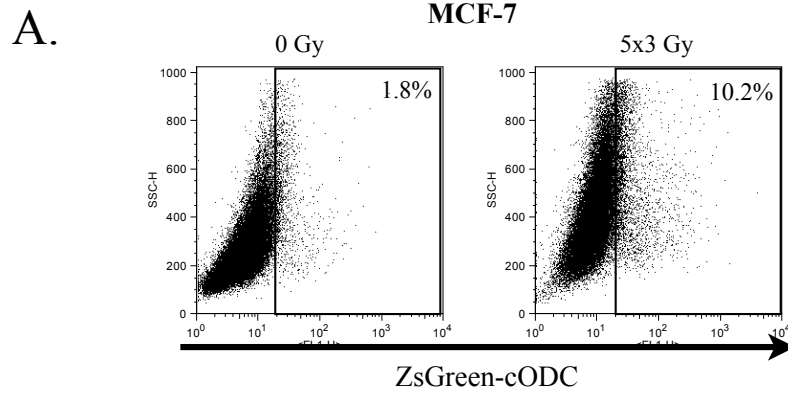

**B.**

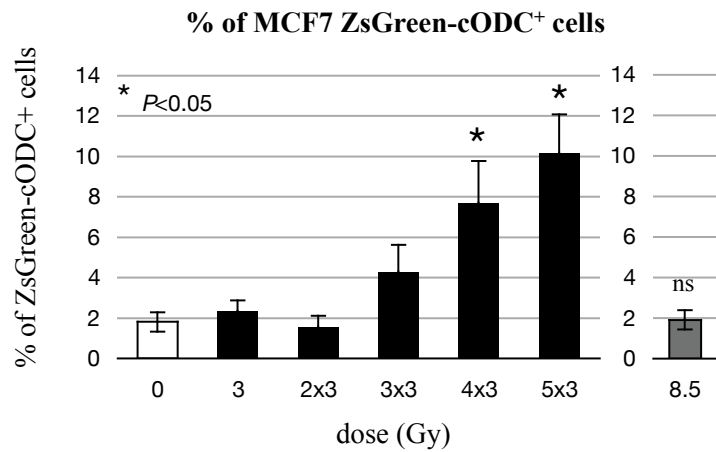

**D.**

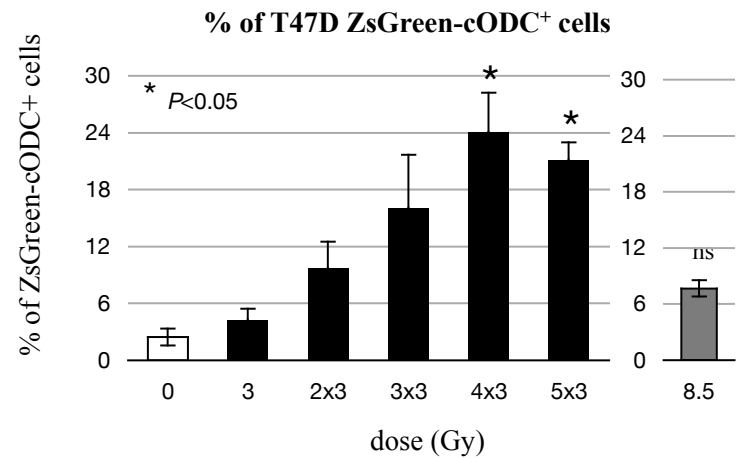

**C.**

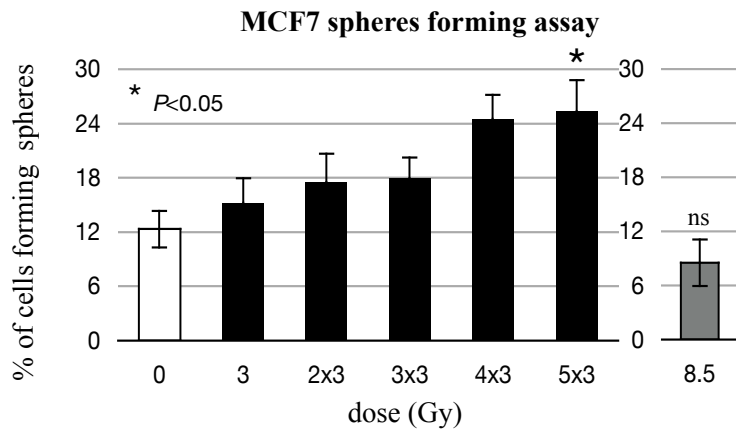

**E.**

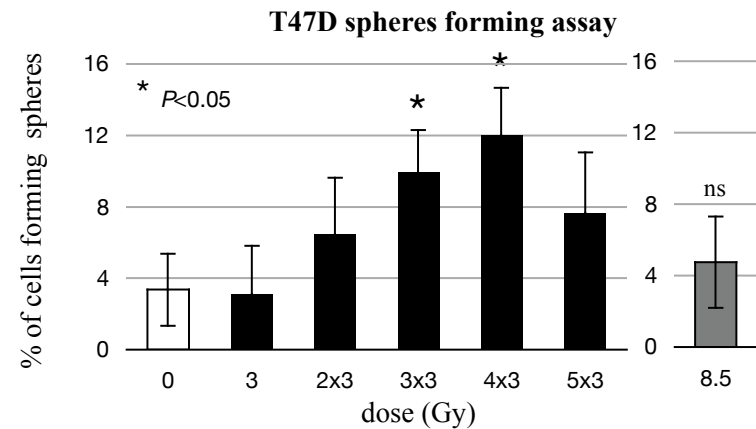

Supplement: MOESM7 [file 9701424]
